# Supplementary material for: Screening of Early Flowering Lotus (Nelumbo nucifera Gaertn.) Cultivars and Effects of Different Cultivars on Flowering Period
Source: MDPI journal article supplement (doi:10.3390/plants12081683), 2023-04-17
Supplement: s1 [file s1]

Table S1. Photos of 19 lotus cultivars

| Cultivar              | Top view                                                                            | 2-3 days after flowering                                                             |
|-----------------------|-------------------------------------------------------------------------------------|--------------------------------------------------------------------------------------|
| ‘Qian Tang Chun Xiao’ |    |    |
| ‘Cheng Shan Qiu Yue’  |   |   |
| ‘Qian Tang Jiao Yang’ |  |  |
| ‘Xiang Hu Ming Yue’   |  |  |

| Cultivar             | Top view                                                                            | 2-3 days after flowering                                                             |
|----------------------|-------------------------------------------------------------------------------------|--------------------------------------------------------------------------------------|
| 'Fen Yan Zi'         |    |    |
| 'Wu Zhi Lian'        |   |   |
| 'Cheng Shan Fen Dai' |  |  |
| 'Yue Cheng Fu Qu'    |  |  |



| Cultivar            | Top view                                                                            | 2-3 days after flowering                                                             |
|---------------------|-------------------------------------------------------------------------------------|--------------------------------------------------------------------------------------|
| 'Bai Ju Hua'        |    |    |
| 'Jun Yu Lian'       |   |   |
| 'Kua Hu Qiao'       |  |  |
| 'Xing Yue Dian Cui' |  |  |

| Cultivar              | Top view                                                                            | 2-3 days after flowering                                                             |
|-----------------------|-------------------------------------------------------------------------------------|--------------------------------------------------------------------------------------|
| 'Guang Hui'           |    |    |
| 'Xiang Hu Xian Zi'    |   |   |
| 'Xiang Hu Yan Yu'     |  |  |
| 'Qian Tang Chao Yong' |  |  |



| Cultivar              | Top view                                                                            | 2-3 days after flowering                                                             |
|-----------------------|-------------------------------------------------------------------------------------|--------------------------------------------------------------------------------------|
| 'Dan Yang Dian Jiang' |    |    |
| 'Xiang Hu Ming Cui'   |   |   |
| 'Xiang Hu Lian Yi'    |  |  |
